# Supplementary material for: Reconstruction of transmission chains of SARS-CoV-2 amidst multiple outbreaks in a geriatric acute-care hospital: a combined retrospective epidemiological and genomic study
Source: eLife journal article supplement (doi:10.7554/elife.76854), 2022-07-04
Supplement: supp [file elife-76854-supp-v1.zip]

Archive with 5 entries (5 files):
- elife_poa_e76854_Transparent_Reporting_File.docx
- elife_poa_e76854_Figure_1_figure_supplement_1.pdf
- elife_poa_e76854_Figure_3_figure_supplement_1.pdf
- elife_poa_e76854_Figure_3_figure_supplement_2.pdf
- elife_poa_e76854_Figure_3_figure_supplement_3.pdf
