# Supplementary figures and images for: Reconstruction of transmission chains of SARS-CoV-2 amidst multiple outbreaks in a geriatric acute-care hospital: a combined retrospective epidemiological and genomic study
Source: eLife journal article supplement (doi:10.7554/elife.76854), 2022-07-04

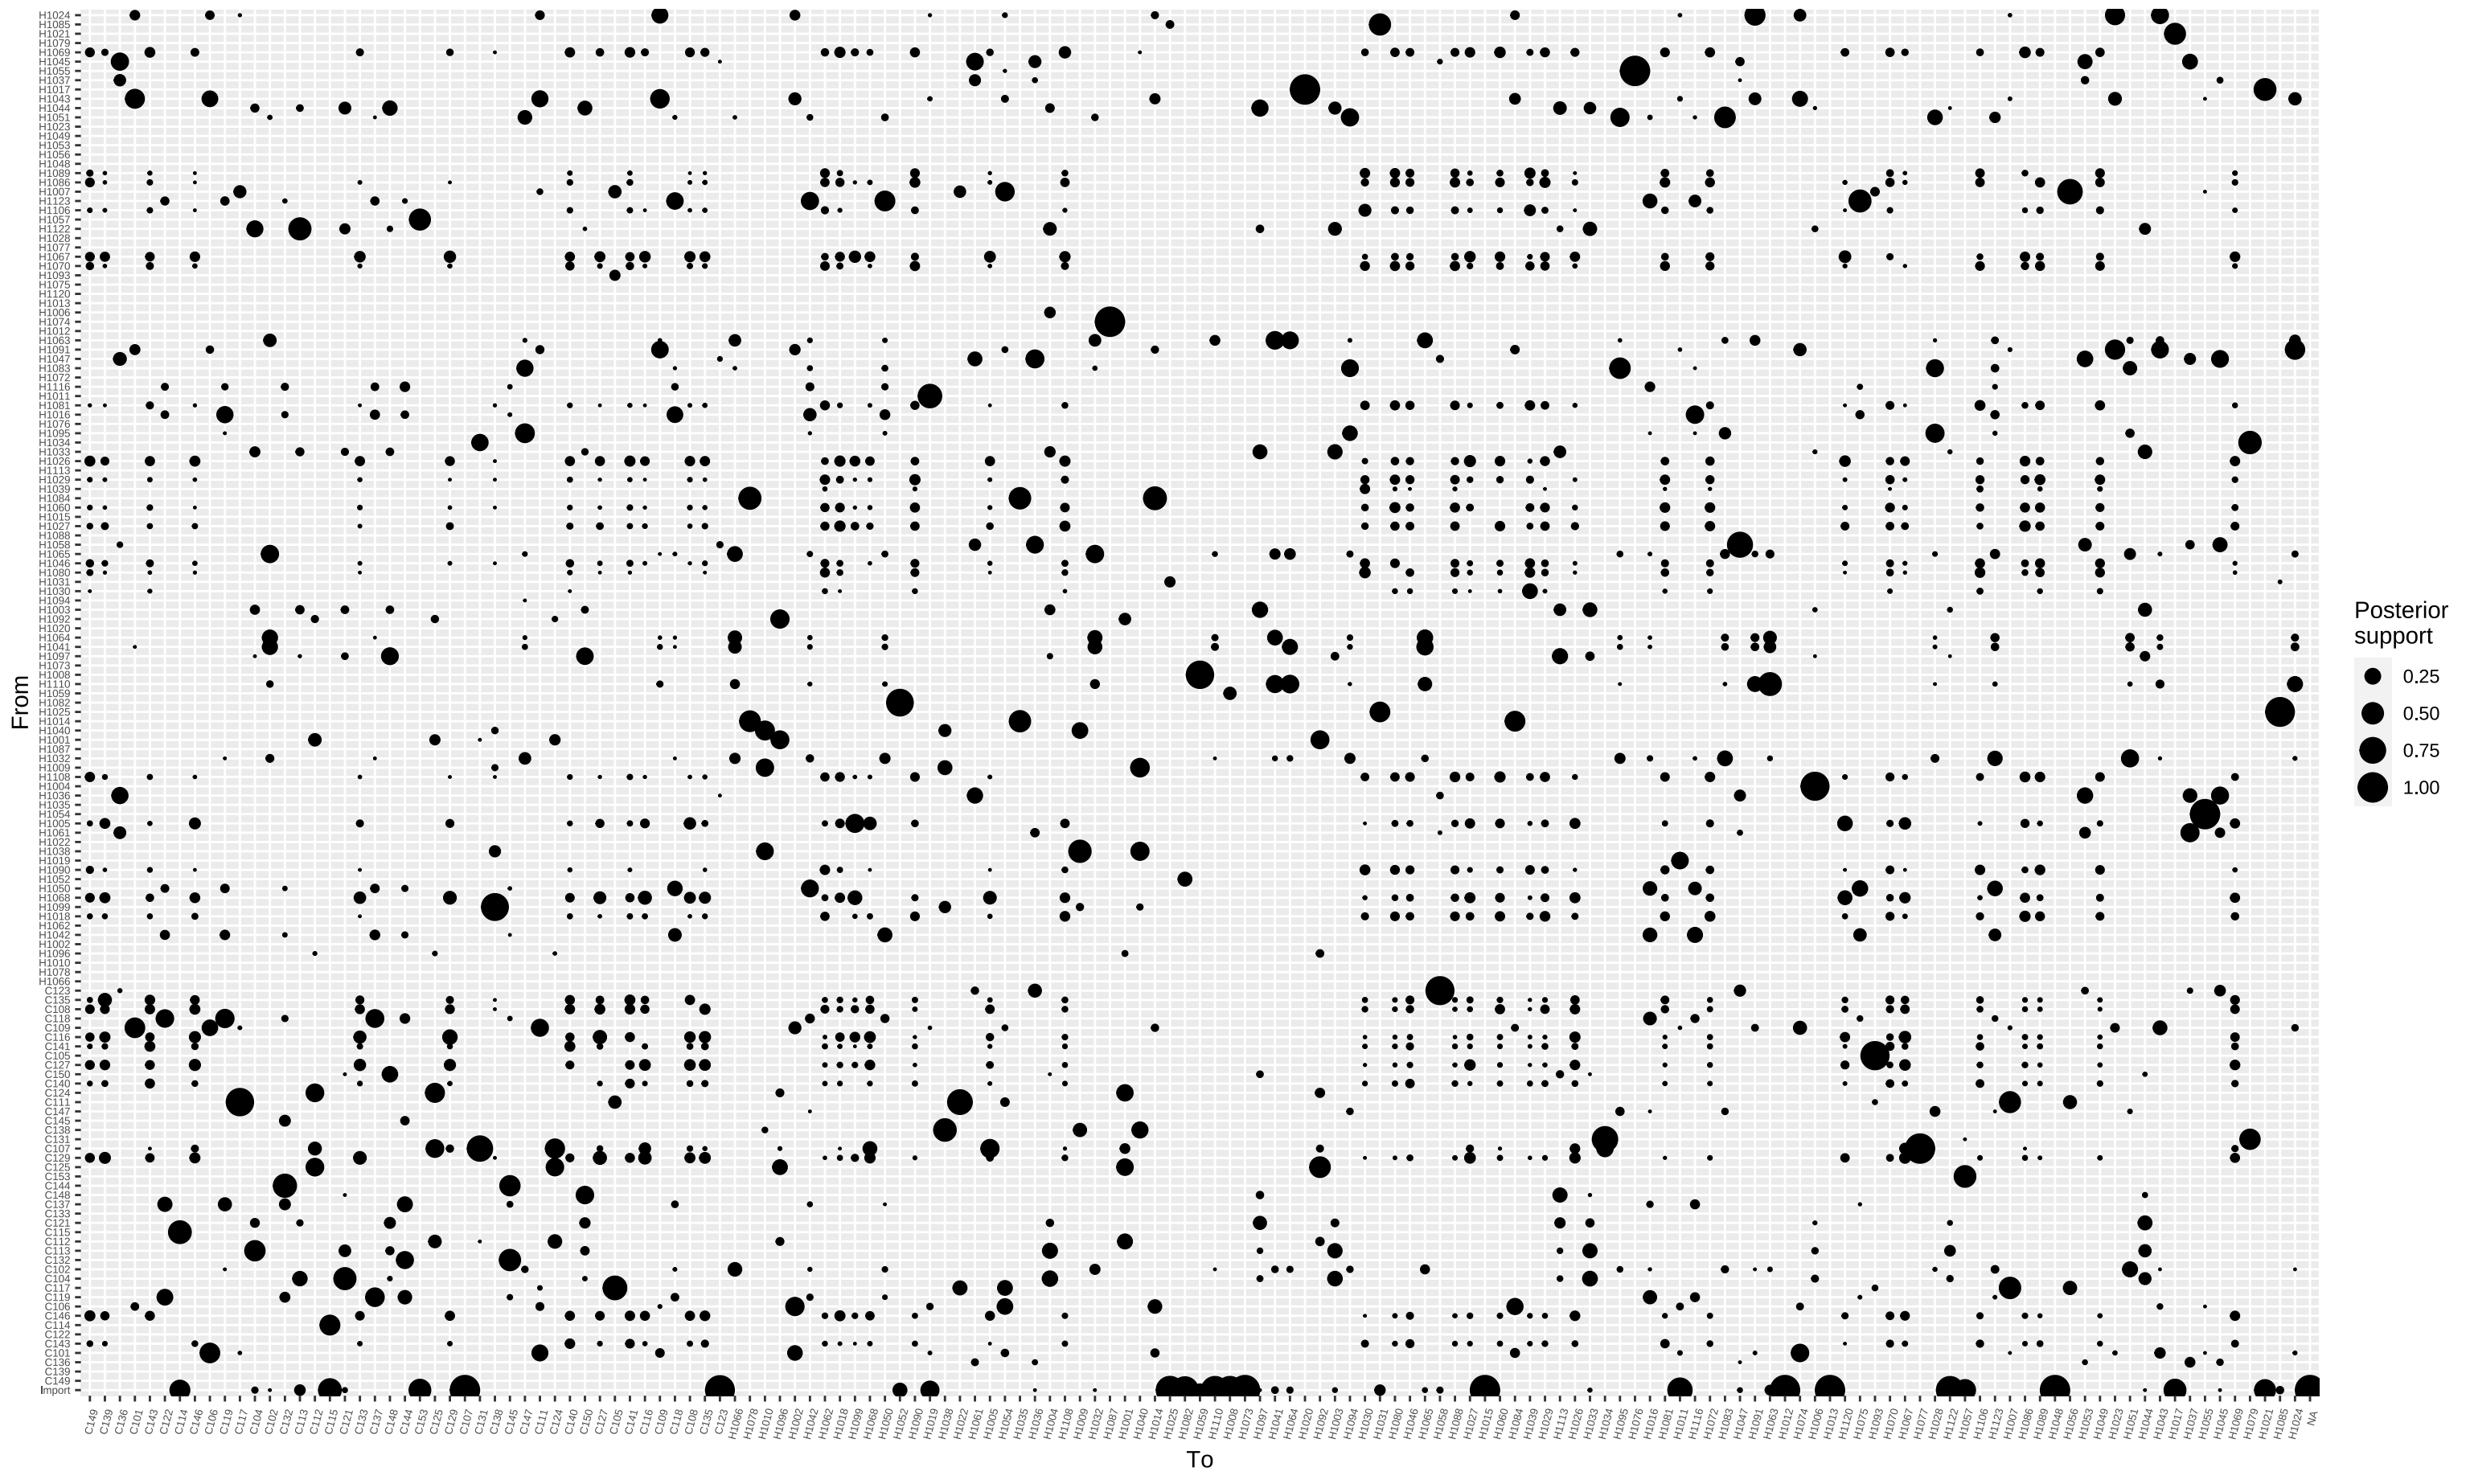

Supplement: supp [file elife-76854-supp-v1.zip]

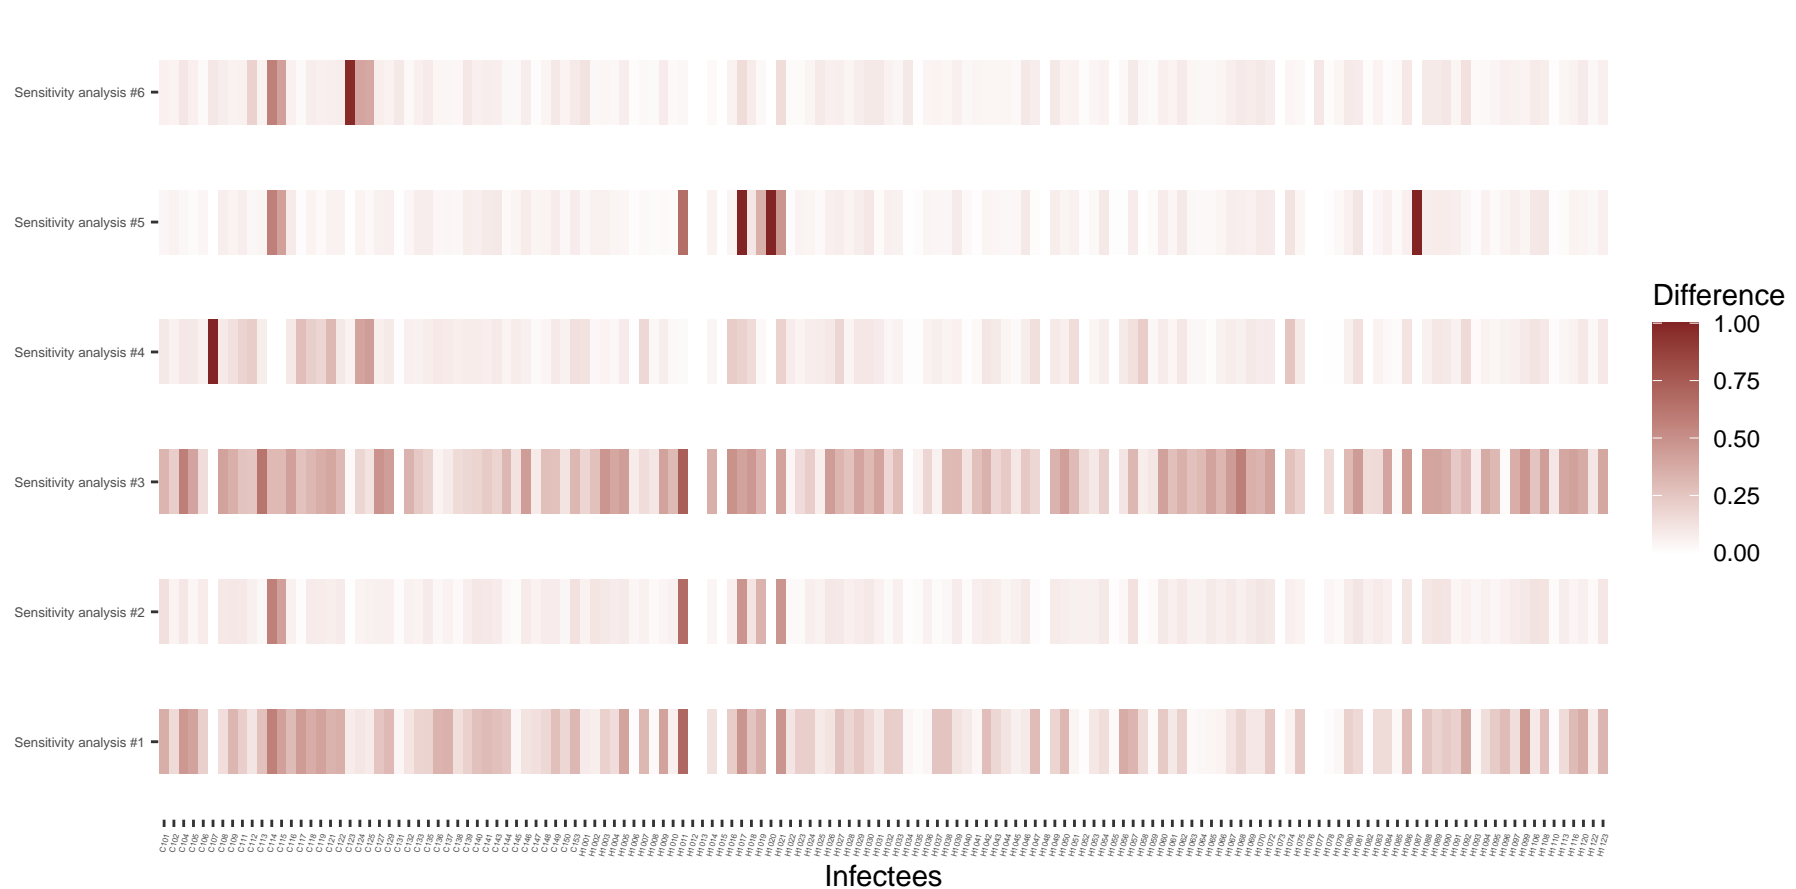

Supplement: supp [file elife-76854-supp-v1.zip]

# Epicurve of SARS-CoV-2 positive cases in geriatrics

Weekly incidence, by ward

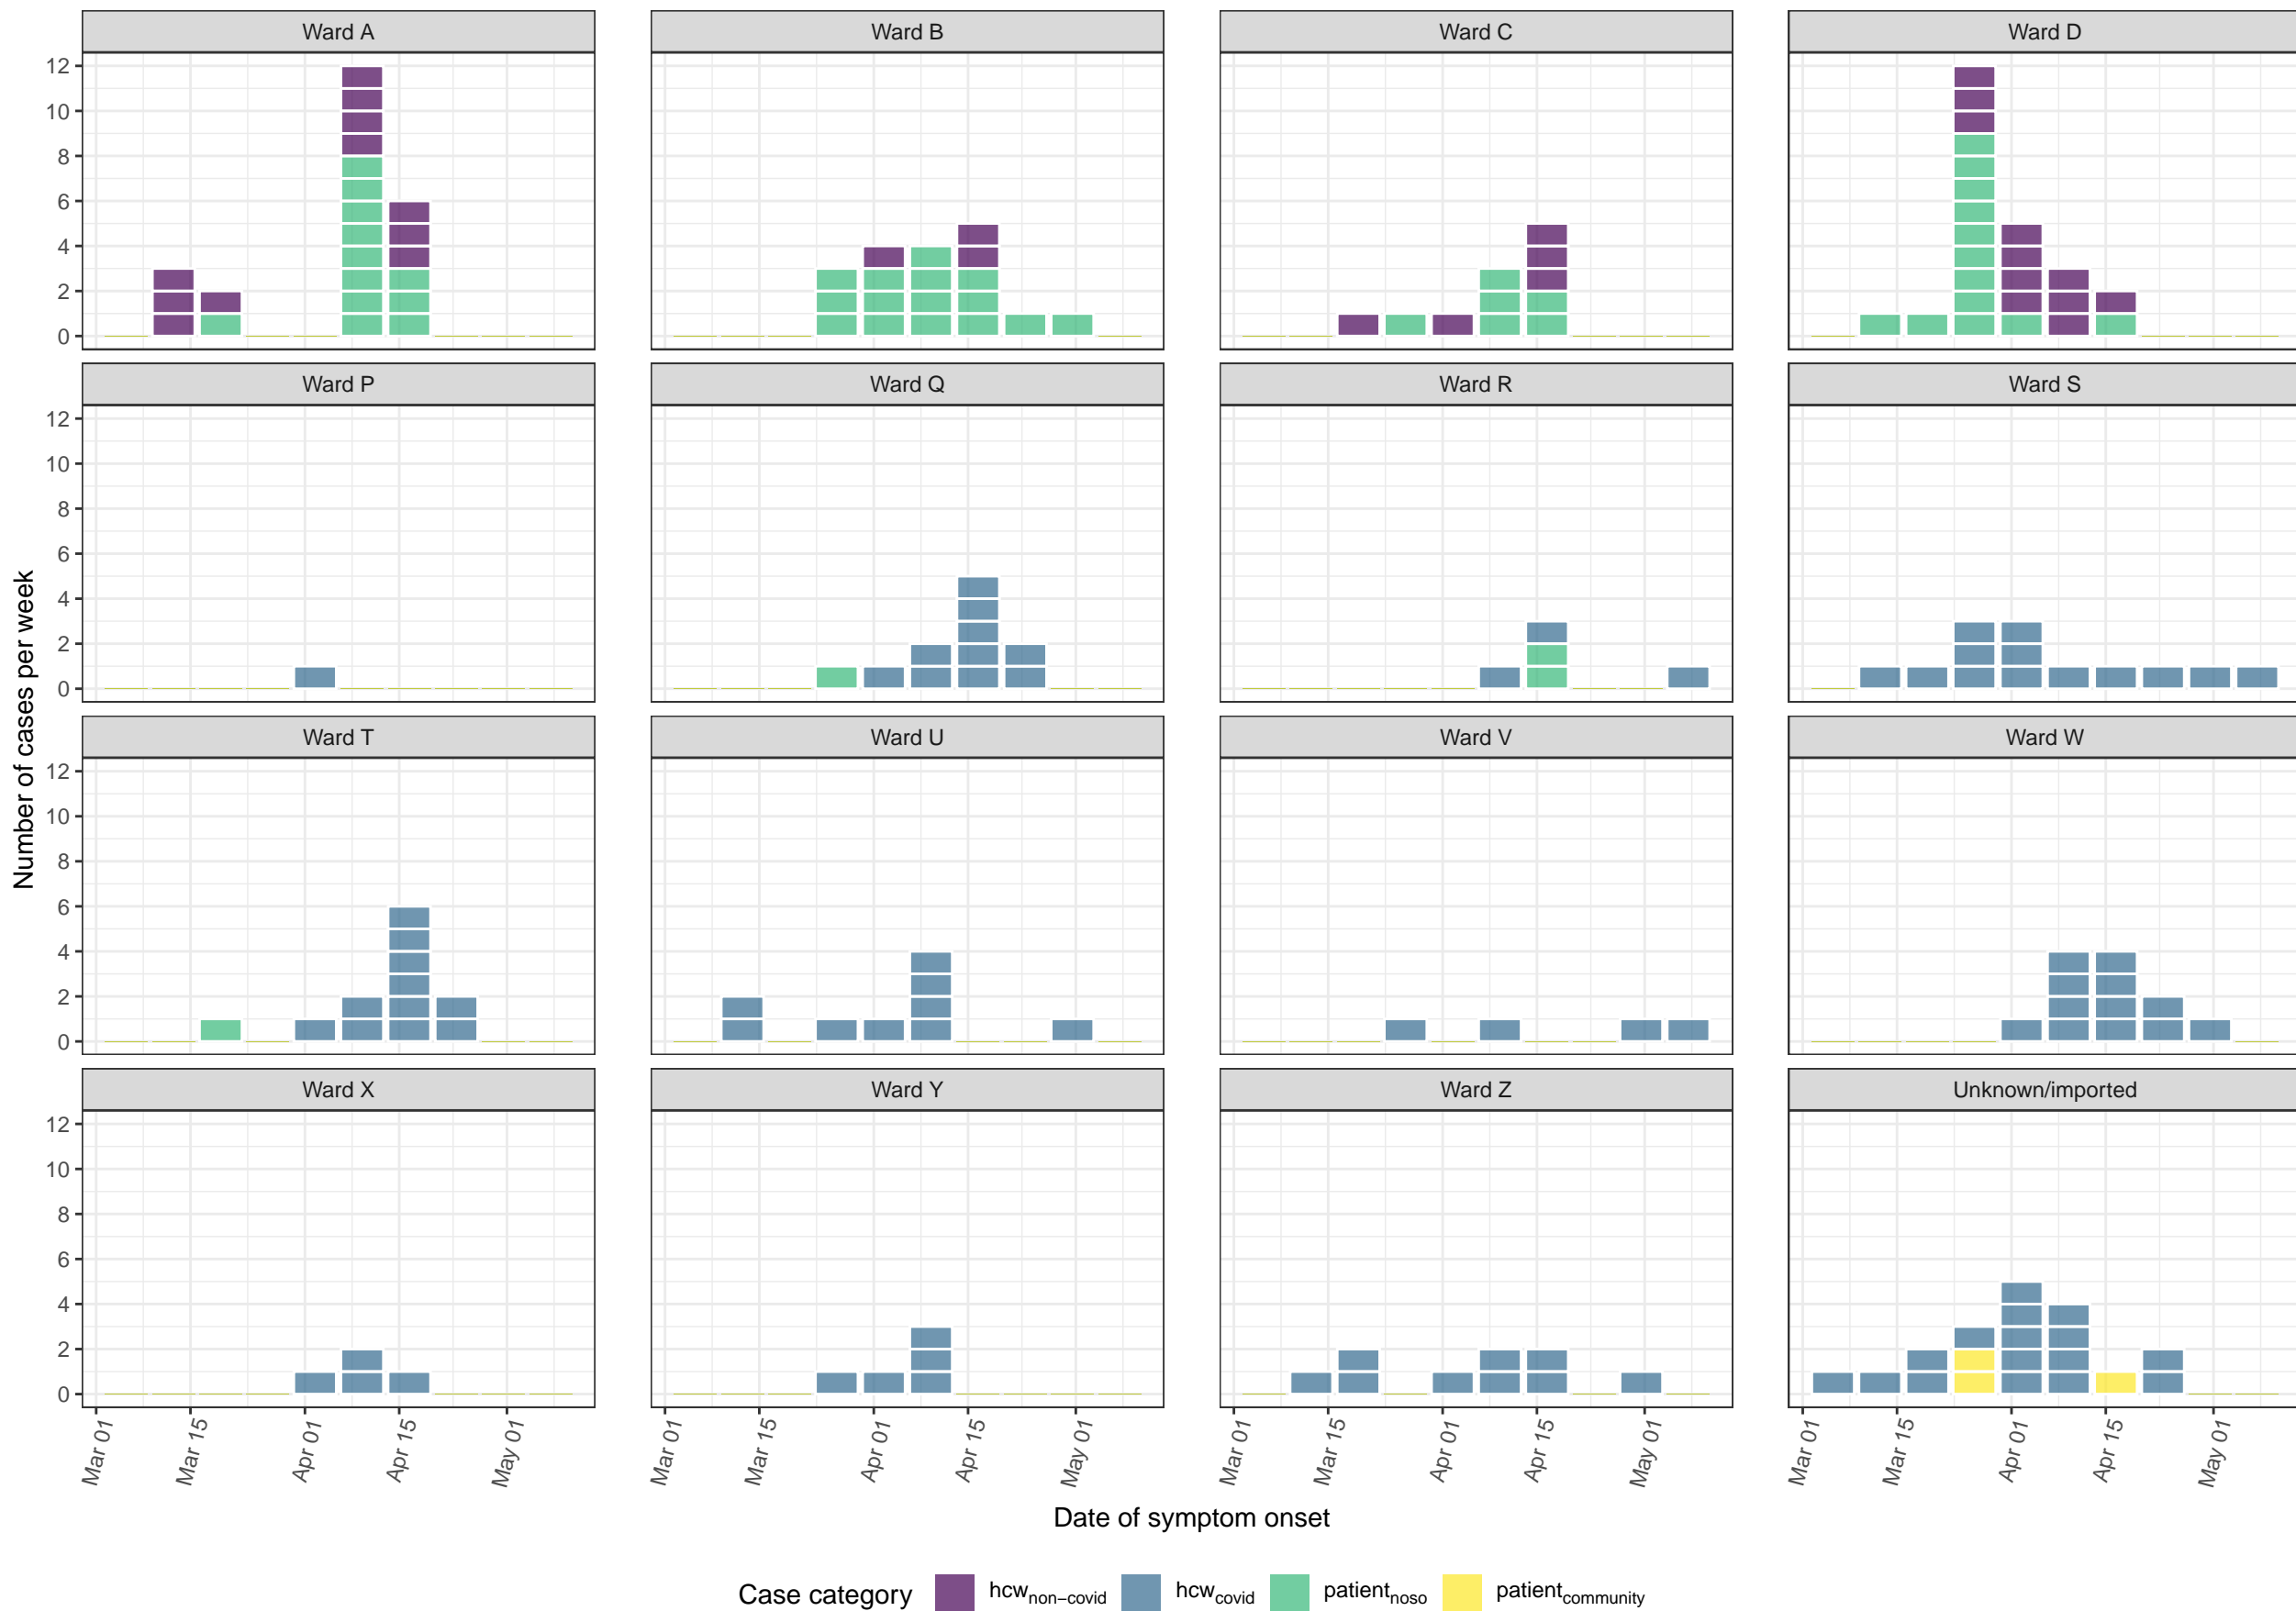

Supplement: supp [file elife-76854-supp-v1.zip]

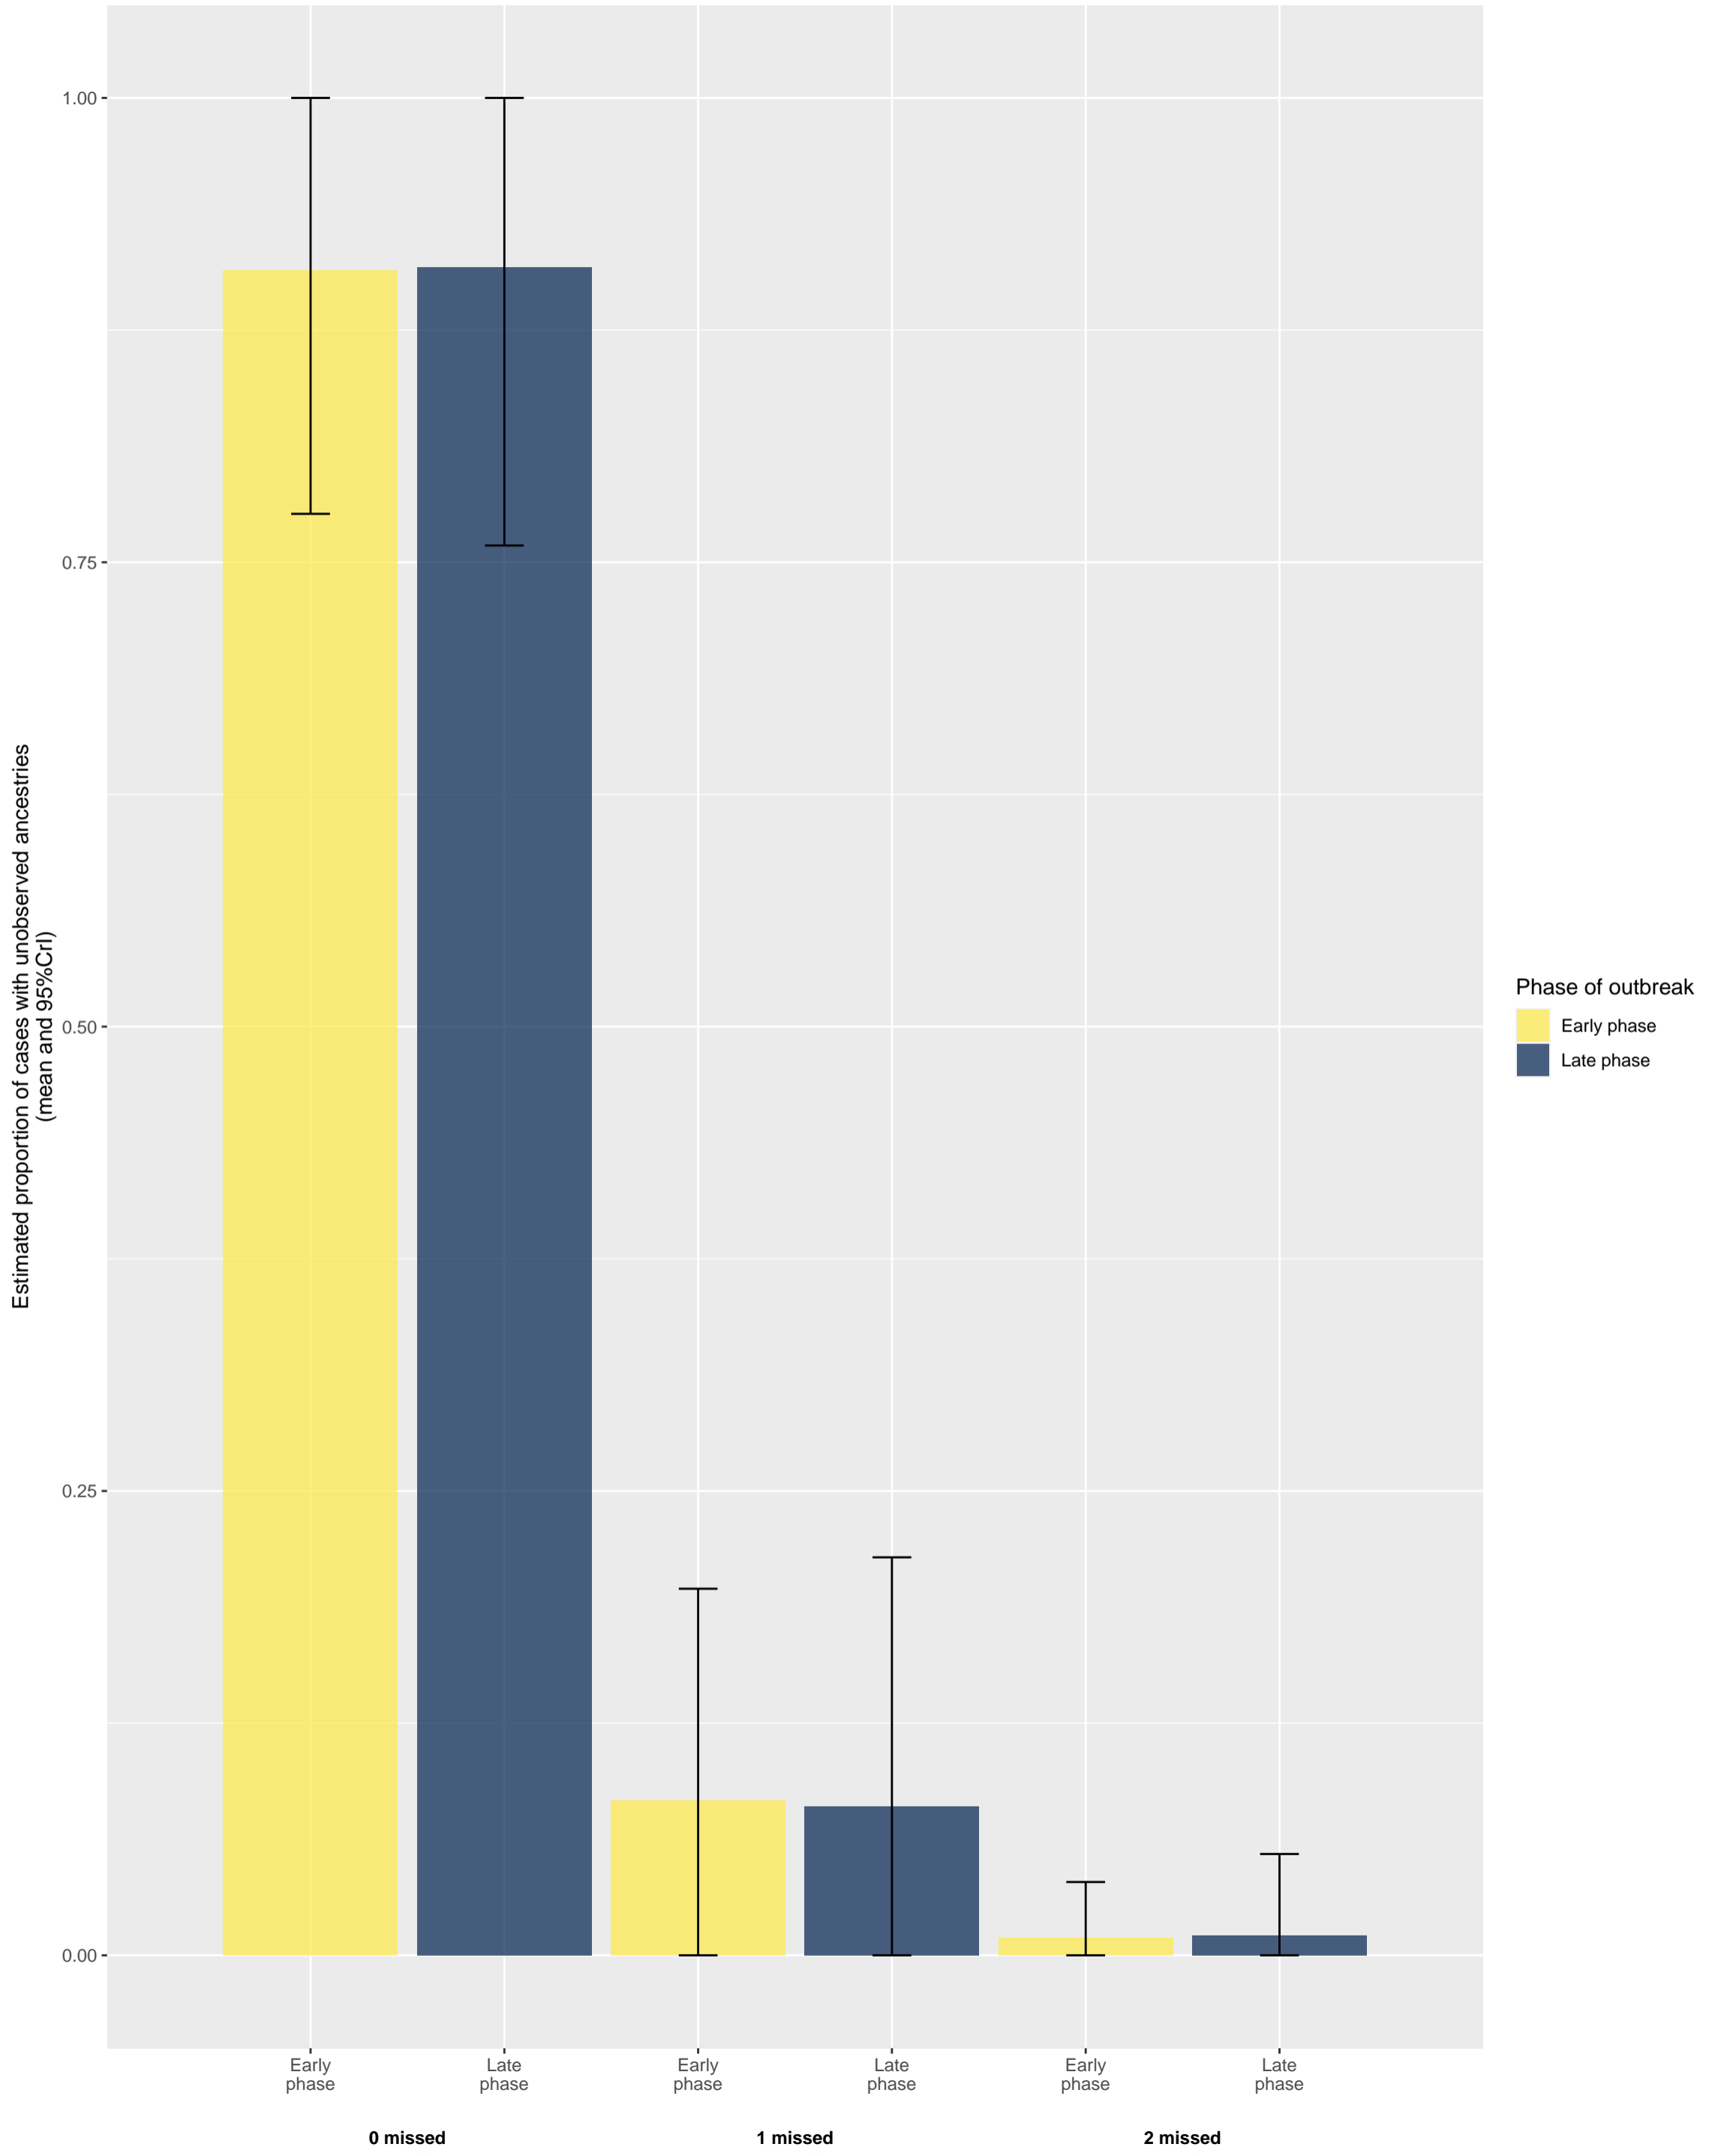

Supplement: supp [file elife-76854-supp-v1.zip › elife_poa_e76854_Figure_3_figure_supplement_2.pdf]
